# Supplementary material for: Simultaneous Confidence Bands for the Coefficient Function in Functional Regression
Source: Springer Nature journal article supplement (doi:10.1007/s00261-019-02023-1), 2008-01-01
Supplement: MOESM2 [file 16681698]

**Supplement Table 2. Associations between AUA risk and MRI features; and AUA risk and genetic test results.**

| **Features** | | **AUA Risk Group** | | | **p-Value** |
| --- | --- | --- | --- | --- | --- |
| **Low (n=54)** | **Intermediate (n=60)** | **High (n=4)** |
| Magnetic Resonance Imaging Features for Reader 1 | PI-RADS v2 score (%) |  |  |  | <0.001 |
| 2 | 9 (16.7) | 12 (20.0) | 0 (0.0) |
| 3 | 19 (35.2) | 13 (21.7) | 0 (0.0) |
| 4 | 21 (38.9) | 32 (53.3) | 0 (0.0) |
| 5 | 5 (9.3) | 3 (5.0) | 4 (100.0) |
| Extracapsular Extension (%) | 8 (14.8) | 8 (13.3) | 4 (100.0) | <0.001 |
| Median Tumor Length on T2w images (mm)[range] | 8.0 [0.0, 21.3] | 8.0 [0.0, 35.4] | 26.4 [23.2, 29.3] | 0.002 |
| Median Tumor Length on ADC maps (mm) [ [range] | 7.5 [0.0, 26.0] | 7.8 [0.0, 36.4] | 27.1 [25.6, 28.1] | 0.002 |
| Median Tumor Volume on ADC maps (cm3) [ [range] | 0.2  [0.0, 2.8] | 0.3 [0.0, 8.9] | 4.1 [3.2, 8.0] | 0.002 |
| Median Tumor ADC values (mm2/s) [range] | 1.2  [0.6, 1.9] | 1.0 [0.5, 2.5] | 0.5  [0.4, 0.8] | 0.008 |
| Median Tumor Volume with Markedly Restricted Diffusion (cm3) [range] | 0.0 [0.0, 2.2] | 0.1 [0.0, 7.5] | 3.1 [2.9, 7.2] | 0.001 |
| Magnetic Resonance Imaging Features for Reader 2 | PI-RADS v2 score (%) |  |  |  | <0.001 |
| 2 | 14 (25.9) | 6 (10.0) | 0 (0.0) |
| 3 | 15 (27.8) | 23 (38.3) | 0 (0.0) |
| 4 | 22 (40.7) | 30 (50.0) | 0 (0.0) |
| 5 | 3 (5.6) | 1 (1.7) | 4 (100) |
| Extracapsular Extension (%) | 6 (11.1) | 8 (13.3) | 4 (100) | <0.001 |
| Median Tumor Length on T2w images (mm)[range] | 8.0 [0.0, 23.5] | 6.9 [0.0, 30.9] | 24.2 [17.0, 26.8] | 0.004 |
| Median Tumor Length on ADC maps (mm) [ [range] | 7.2 [0.0, 24.2] | 6.5 [0.0, 37.1] | 23.8 [16.4, 27.0] | 0.004 |
| Median Tumor Volume on ADC maps (cm3) [ [range] | 0.2 [0.0, 2.8] | 0.3 [0.0, 9.5] | 4.0 [3.4, 7.3] | 0.002 |
| Median Tumor ADC values (mm2/s) [range] | 1.2 [0.5, 1.9] | 1.0 [0.4, 1.9] | 0.5 [0.5, 0.6] | 0.007 |
| Median Tumor Volume with Markedly Restricted Diffusion (cm3) [range] | 0.02 [0.0, 2.2] | 0.08 [0.0, 8.0] | 3.2 [3.0, 6.6] | 0.002 |
| Prolaris® Results | Median CCR score [range] | 3.2 [1.6, 4.4] | 3.3 [1.8, 5.5] | 4.4 [2.6, 4.6] | 0.051 |
| Prolaris® Risk group (%) |  |  |  | 0.462 |
| Less aggressive | 13 (24.1) | 19 (31.7) | 1 (25.0) |
| Consistent | 30 (55.6) | 26 (43.3) | 1 (25.0) |
| More aggressive | 11 (20.4) | 15 (25.0) | 2 (50.0) |
| Abbreviations: ADC Apparent Diffusion Coefficient, AUA American Urologic Association, CCR Cell Cycle Risk, PI-RADSv2 Prostate Imaging Reporting and Data System version 2 | | | | | |
